# Supplementary material for: White-emitting film of diblock copolymer micelles with perovskite nanocrystals
Source: Royal Society of Chemistry journal article supplement (doi:10.1039/d2ra00098a), 2022-01-01
Supplement: d2ra00098a1.pdf [file d2ra00098a1.pdf]

## Supplementary Information

# White-Emitting Film of Diblock Copolymer Micelles with Perovskite Nanocrystals

*Kyunghyeon Lee<sup>†</sup>, Joon Young Kim<sup>†</sup>, and Byeong-Hyeok Sohn\**

Department of Chemistry, Seoul National University, Seoul 08826, Republic of Korea

<sup>†</sup>Equal contribution.

\*Corresponding Author. E-mail address: [bhsohn@snu.ac.kr](mailto:bhsohn@snu.ac.kr)

Tel: 82-2-883-2154 Fax: 82-2-889-1568

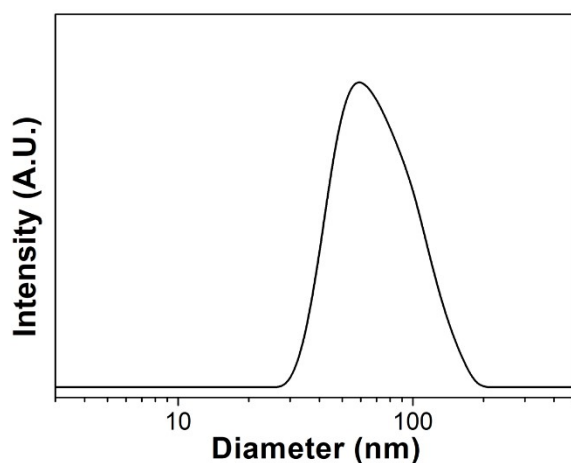

**Figure S1.** DLS distribution of PS-*b*-P2VP micelles having CsPbBr<sub>3</sub> nanocrystals.

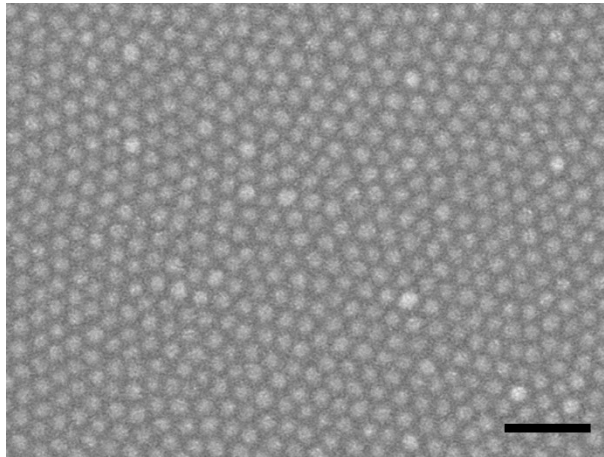

**Figure S2.** An SEM image of a monolayer of PS-*b*-P2VP micelles having CsPbBr<sub>3</sub> nanocrystals dip-coated on a quartz substrate. The scale bar is 200 nm.

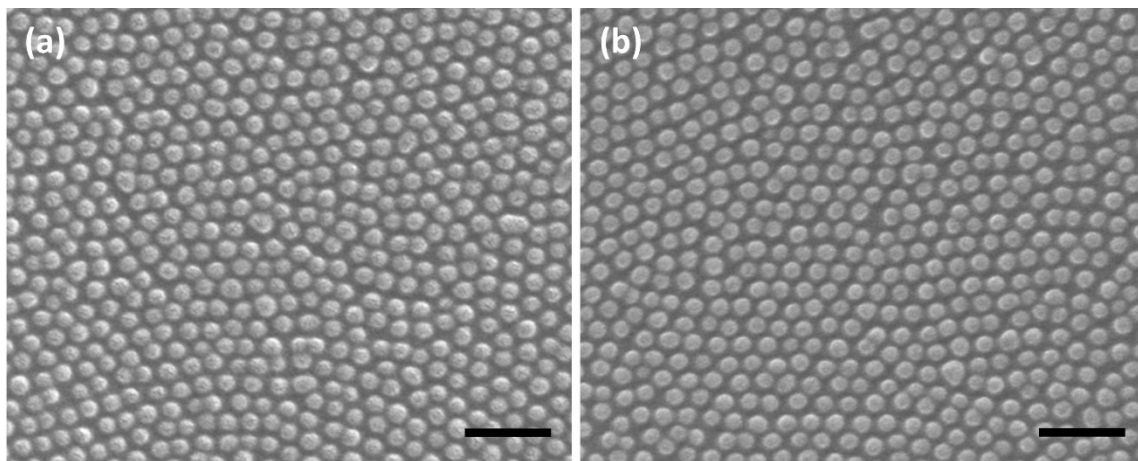

**Figure S3.** SEM images of a monolayer of PS-*b*-P2VP micelles coated on a stretchable PDMS elastomer: (a) before extension; (b) after extension. The scale bars are 200 nm.

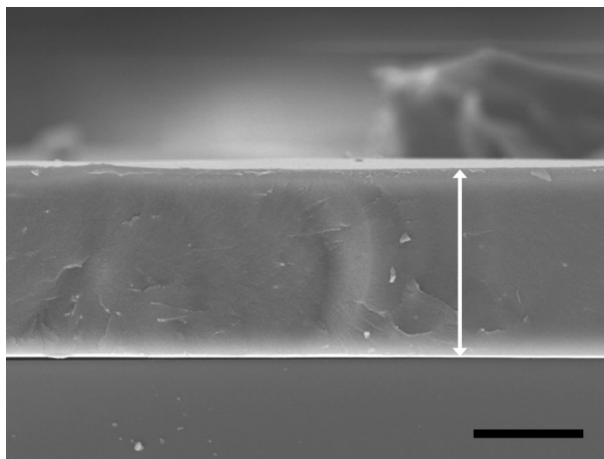

**Figure S4.** Side-view SEM image of the white-emitting film with the arrow indicating the thickness of  $\sim 18 \mu\text{m}$ . The scale bar is  $10 \mu\text{m}$ .
